# Supplementary material
Source: PubMed Central journal article supplement (PMC7331065)
Supplement: ao0c01686_si_001.pdf [file ao0c01686_si_001.pdf]

## Supporting Information

### Designing Novel Zn decorated Inorganic B<sub>12</sub>P<sub>12</sub> Nanoclusters with promising electronic properties. A step forward towards efficient CO<sub>2</sub> sensing materials

Shahid Hussain<sup>a</sup>, Shahzad Ali Shahid Chatha<sup>a</sup>, Abdullah Ijaz Hussain<sup>a</sup>, Riaz Hussain<sup>b</sup>, Muhammad Yasir Mehboob<sup>b</sup>, Tahsin Gulzar<sup>a</sup>, Asim Mansha<sup>c</sup>, Nabeel Shahzad<sup>c</sup> and Khurshid Ayub<sup>d</sup> \*.

<sup>a</sup> Department of Applied Chemistry, Government College University, Faisalabad – 38000, Pakistan.

<sup>b</sup> Department of Chemistry, University of Okara, Okara, Punjab, Pakistan.

<sup>c</sup> Department of Chemistry, Government College University, Faisalabad – 38000, Pakistan.

<sup>d</sup> Department of Chemistry, COMSATS University, Abbottabad Campus, Abbottabad-22060, Pakistan

#### Corresponding Author

Tel: +92-992-383591

Fax: +92-992-383441

Email: [Khurshid@cuiatd.edu.pk](mailto:Khurshid@cuiatd.edu.pk) (K.A)

#### Optimized Cartesian coordinate of all geometries

##### B<sub>12</sub>P<sub>12</sub> nanocage

| Symbol | X           | Y           | Z           |
|--------|-------------|-------------|-------------|
| B      | 1.18782709  | 2.43305319  | -0.00049500 |
| B      | 0.00000000  | 1.18828809  | -2.43288118 |
| B      | -1.18782709 | 2.43305319  | -0.00049500 |
| B      | 0.00000000  | 1.18790509  | 2.43364818  |
| B      | -2.43299318 | 0.00000000  | -1.18798909 |
| B      | -2.43290519 | 0.00000000  | 1.18794809  |
| B      | -1.18782709 | -2.43305319 | -0.00049500 |
| B      | -0.00000000 | -1.18790509 | 2.43364818  |
| B      | -0.00000000 | -1.18828809 | -2.43288118 |
| B      | 1.18782709  | -2.43305319 | -0.00049500 |
| B      | 2.43290519  | -0.00000000 | 1.18794809  |

## Supporting Information

|   |             |             |             |
|---|-------------|-------------|-------------|
| B | 2.43299318  | -0.00000000 | -1.18798909 |
| P | -2.83481622 | 1.46638211  | 0.00016400  |
| P | -2.83481622 | -1.46638211 | 0.00016400  |
| P | -1.46619511 | 0.00000000  | -2.83481122 |
| P | 0.00000000  | 2.83573622  | -1.46682111 |
| P | 0.00000000  | 2.83424822  | 1.46608611  |
| P | 1.46619511  | -0.00000000 | -2.83481122 |
| P | 2.83481622  | 1.46638211  | 0.00016400  |
| P | 2.83481622  | -1.46638211 | 0.00016400  |
| P | 1.46652111  | -0.00000000 | 2.83530621  |
| P | -1.46652111 | 0.00000000  | 2.83530621  |
| P | -0.00000000 | -2.83424822 | 1.46608611  |
| P | -0.00000000 | -2.83573622 | -1.46682111 |

### CO<sub>2</sub>-B<sub>12</sub>P<sub>12</sub>

| Symbol | X           | Y           | Z           |
|--------|-------------|-------------|-------------|
| B      | 0.64857300  | 2.28844900  | 0.84326600  |
| B      | -1.12707400 | 0.62887000  | 2.57064300  |
| B      | 1.65187300  | 0.25295600  | 1.56165600  |
| B      | 1.69090000  | 0.61865100  | -1.39721600 |
| B      | -0.20379400 | -2.06923400 | 1.70440700  |
| B      | 1.17454400  | -2.07546800 | -0.23327800 |
| B      | -1.73862500 | -2.27313700 | -0.84276900 |
| B      | 0.03619200  | -0.61607700 | -2.56930100 |
| B      | -2.78281100 | -0.60600900 | 1.39637800  |
| B      | -2.74319000 | -0.24190700 | -1.56088500 |

## Supporting Information

|   |             |             |             |
|---|-------------|-------------|-------------|
| B | -0.88551200 | 2.08412900  | -1.70424200 |
| B | -2.26229300 | 2.08849700  | 0.23360900  |
| P | 1.67686400  | -1.65525100 | 1.58091700  |
| P | -0.36786800 | -3.17666300 | 0.13272900  |
| P | -1.56772300 | -1.24049300 | 2.75407900  |
| P | 0.58119700  | 1.48177200  | 2.59482300  |
| P | 2.27839400  | 1.47534000  | 0.20579000  |
| P | -2.80782800 | 1.26504200  | 1.86804100  |
| P | -0.72202100 | 3.19183900  | -0.13254200 |
| P | -2.76571500 | 1.66770100  | -1.58083500 |
| P | 0.47634200  | 1.25406500  | -2.75466100 |
| P | 1.71790200  | -1.25072500 | -1.86799600 |
| P | -1.67219700 | -1.46903300 | -2.59550000 |
| P | -3.37031300 | -1.46359700 | -0.20539700 |
| C | 5.94776200  | -0.07139800 | -0.00001800 |
| O | 5.08932900  | -0.86698100 | -0.00859400 |
| O | 6.80617300  | 0.72070300  | 0.00822300  |

### D1

| Symbol | X           | Y          | Z           |
|--------|-------------|------------|-------------|
| B      | 1.18782700  | 2.43305300 | -0.00049500 |
| B      | 0.00000000  | 1.18828800 | -2.43288100 |
| B      | -1.18782700 | 2.43305300 | -0.00049500 |
| B      | 0.00000000  | 1.18790500 | 2.43364800  |
| B      | -2.43299300 | 0.00000000 | -1.18798900 |
| B      | -2.43290500 | 0.00000000 | 1.18794800  |

## Supporting Information

|    |             |             |             |
|----|-------------|-------------|-------------|
| B  | -1.18782700 | -2.43305300 | -0.00049500 |
| B  | 0.00000000  | -1.18790500 | 2.43364800  |
| B  | 0.00000000  | -1.18828800 | -2.43288100 |
| B  | 1.18782700  | -2.43305300 | -0.00049500 |
| B  | 2.43290500  | 0.00000000  | 1.18794800  |
| B  | 2.43299300  | 0.00000000  | -1.18798900 |
| P  | -2.83481600 | 1.46638200  | 0.00016400  |
| P  | -2.83481600 | -1.46638200 | 0.00016400  |
| P  | -1.46619500 | 0.00000000  | -2.83481100 |
| P  | 0.00000000  | 2.83573600  | -1.46682100 |
| P  | 0.00000000  | 2.83424800  | 1.46608600  |
| P  | 1.46619500  | 0.00000000  | -2.83481100 |
| P  | 2.83481600  | 1.46638200  | 0.00016400  |
| P  | 2.83481600  | -1.46638200 | 0.00016400  |
| P  | 1.46652100  | 0.00000000  | 2.83530600  |
| P  | -1.46652100 | 0.00000000  | 2.83530600  |
| P  | 0.00000000  | -2.83424800 | 1.46608600  |
| P  | 0.00000000  | -2.83573600 | -1.46682100 |
| Zn | 0.91754779  | -0.73920798 | 2.79677697  |

## D2

| Symbol | X           | Y          | Z           |
|--------|-------------|------------|-------------|
| B      | 1.02554058  | 2.38253919 | 1.26672008  |
| B      | -0.16228642 | 1.13777419 | -1.16566592 |
| B      | -1.35011342 | 2.38253919 | 1.26672008  |
| B      | -0.16228642 | 1.13739119 | 3.70086308  |

## Supporting Information

|    |             |             |             |
|----|-------------|-------------|-------------|
| B  | -2.59527942 | -0.05051381 | 0.07922608  |
| B  | -2.59519142 | -0.05051381 | 2.45516308  |
| B  | -1.35011342 | -2.48356681 | 1.26672008  |
| B  | -0.16228642 | -1.23841881 | 3.70086308  |
| B  | -0.16228642 | -1.23880181 | -1.16566592 |
| B  | 1.02554058  | -2.48356681 | 1.26672008  |
| B  | 2.27061858  | -0.05051381 | 2.45516308  |
| B  | 2.27070658  | -0.05051381 | 0.07922608  |
| P  | -2.99710242 | 1.41586819  | 1.26737908  |
| P  | -2.99710242 | -1.51689581 | 1.26737908  |
| P  | -1.62848142 | -0.05051381 | -1.56759592 |
| P  | -0.16228642 | 2.78522219  | -0.19960592 |
| P  | -0.16228642 | 2.78373419  | 2.73330108  |
| P  | 1.30390858  | -0.05051381 | -1.56759592 |
| P  | 2.67252958  | 1.41586819  | 1.26737908  |
| P  | 2.67252958  | -1.51689581 | 1.26737908  |
| P  | 1.30423458  | -0.05051381 | 4.10252108  |
| P  | -1.62880742 | -0.05051381 | 4.10252108  |
| P  | -0.16228642 | -2.88476181 | 2.73330108  |
| P  | -0.16228642 | -2.88624981 | -0.19960592 |
| Zn | 0.62145805  | -0.71647923 | -3.15801940 |

### D3

| Symbol | X          | Y          | Z           |
|--------|------------|------------|-------------|
| B      | 1.18782700 | 2.43305300 | -0.00049500 |
| B      | 0.00000000 | 1.18828800 | -2.43288100 |

## Supporting Information

|   |             |             |             |
|---|-------------|-------------|-------------|
| B | -1.18782700 | 2.43305300  | -0.00049500 |
| B | 0.00000000  | 1.18790500  | 2.43364800  |
| B | -2.43299300 | 0.00000000  | -1.18798900 |
| B | -2.43290500 | 0.00000000  | 1.18794800  |
| B | -1.18782700 | -2.43305300 | -0.00049500 |
| B | 0.00000000  | -1.18790500 | 2.43364800  |
| B | 0.00000000  | -1.18828800 | -2.43288100 |
| B | 1.18782700  | -2.43305300 | -0.00049500 |
| B | 2.43290500  | 0.00000000  | 1.18794800  |
| B | 2.43299300  | 0.00000000  | -1.18798900 |
| P | -2.83481600 | 1.46638200  | 0.00016400  |
| P | -2.83481600 | -1.46638200 | 0.00016400  |
| P | -1.46619500 | 0.00000000  | -2.83481100 |
| P | 0.00000000  | 2.83573600  | -1.46682100 |
| P | 0.00000000  | 2.83424800  | 1.46608600  |
| P | 1.46619500  | 0.00000000  | -2.83481100 |
| P | 2.83481600  | 1.46638200  | 0.00016400  |
| P | 2.83481600  | -1.46638200 | 0.00016400  |
| P | 1.46652100  | 0.00000000  | 2.83530600  |
| P | -1.46652100 | 0.00000000  | 2.83530600  |

### D4

| Symbol | X           | Y          | Z           |
|--------|-------------|------------|-------------|
| B      | -1.25486100 | 2.59451800 | -0.52474400 |
| B      | -2.85567000 | 0.91074100 | 1.34176800  |
| B      | -0.16018900 | 2.16493200 | 1.54029400  |

## Supporting Information

|    |             |             |             |
|----|-------------|-------------|-------------|
| B  | 1.45520800  | 1.40743300  | -0.84295200 |
| B  | -0.61705000 | -0.56377000 | 2.64640100  |
| B  | 1.48523600  | -0.31750100 | 1.57502200  |
| B  | -0.11962400 | -2.59592100 | 0.52524600  |
| B  | 1.47450900  | -0.90620100 | -1.33667600 |
| B  | -2.83587100 | -1.41385200 | 0.84599000  |
| B  | -1.21464700 | -2.16382900 | -1.53927700 |
| B  | -0.75543400 | 0.56437500  | -2.64889300 |
| B  | -2.86403900 | 0.31811500  | -1.57813600 |
| P  | 0.61012100  | 0.92057100  | 2.76747300  |
| P  | 0.63465100  | -1.94828700 | 2.15598300  |
| P  | -2.52418400 | -0.55890100 | 2.54756700  |
| P  | -2.01182900 | 2.62119900  | 1.24997500  |
| P  | 0.59113400  | 2.92321000  | -0.06709000 |
| P  | -3.87949600 | -0.02755400 | 0.00201200  |
| P  | -2.00696500 | 1.94745600  | -2.15636700 |
| P  | -1.98250900 | -0.91955500 | -2.76757000 |
| P  | 1.15375000  | 0.55931600  | -2.54888300 |
| P  | 2.49623000  | 0.02688000  | -0.00054100 |
| P  | 0.63792500  | -2.62038900 | -1.24925100 |
| P  | -1.96476600 | -2.92421300 | 0.06761100  |
| Zn | 5.50004100  | 0.00029300  | -0.00113300 |

### E1

| Symbol | X          | Y           | Z          |
|--------|------------|-------------|------------|
| B      | 0.36492700 | -2.78876800 | 0.02409600 |

## Supporting Information

|    |             |             |             |
|----|-------------|-------------|-------------|
| B  | 2.82405700  | -1.19911100 | -0.63055600 |
| B  | 1.36301100  | -1.67791400 | 1.89256300  |
| B  | -1.65677300 | -1.10338300 | 1.35549100  |
| B  | 2.58936700  | 1.00050900  | 1.38949400  |
| B  | 0.46452500  | 1.07803600  | 2.27762700  |
| B  | 0.68886900  | 2.85772300  | -0.06391900 |
| B  | -2.09239000 | 1.77203700  | 0.57704500  |
| B  | 2.43944300  | 0.93466400  | -1.57476900 |
| B  | -0.49940900 | 1.77456400  | -1.69306900 |
| B  | -1.75697700 | -1.36917100 | -1.17934200 |
| B  | 0.46653800  | -1.12240700 | -2.32015600 |
| P  | 1.88416900  | -0.09307800 | 2.81297700  |
| P  | 1.49889100  | 2.56977500  | 1.64247700  |
| P  | 3.63044400  | 0.48536900  | -0.13235100 |
| P  | 2.24242600  | -2.64015100 | 0.48320100  |
| P  | -0.38082100 | -2.49402400 | 1.78337400  |
| P  | 2.33684100  | -0.77622500 | -2.45375700 |
| P  | -0.44967500 | -2.71734100 | -1.70369400 |
| P  | -1.03886400 | 0.05397500  | -2.33290600 |
| P  | -3.09813400 | -1.72115300 | 0.16316000  |
| P  | -1.37103200 | 0.71415600  | 1.96898200  |
| P  | -1.19490400 | 3.07663800  | -0.45286600 |
| P  | 1.31677300  | 2.46041900  | -1.81696700 |
| Zn | -3.55392200 | 0.51469100  | 0.01010200  |
| C  | -6.18347940 | 1.32283438  | 0.15381464  |



## Supporting Information

O -7.21193130 1.86409293 0.28129645

O -5.15502749 0.78157582 0.02633283

### E2

| Symbol | X           | Y           | Z           |
|--------|-------------|-------------|-------------|
| B      | -1.66090000 | 2.17775600  | 1.18939700  |
| B      | 1.06534800  | 2.12769400  | 0.00537800  |
| B      | -1.66073500 | 2.18401900  | -1.17821000 |
| B      | -3.28311000 | -0.01943500 | -0.00026400 |
| B      | 0.49726700  | 0.52798400  | -2.40889900 |
| B      | -1.63491100 | -0.52171600 | -2.43199100 |
| B      | 0.50707700  | -2.16678600 | -1.18622400 |
| B      | -2.21779100 | -2.14663400 | -0.00570000 |
| B      | 2.39457500  | 0.00759700  | 0.00025300  |
| B      | 0.50686000  | -2.17296900 | 1.17506000  |
| B      | -1.63514600 | -0.53437700 | 2.42920100  |
| B      | 0.49678000  | 0.51536700  | 2.41184400  |
| P      | -1.21611800 | 1.32013300  | -2.82063900 |
| P      | 0.08232400  | -1.30506800 | -2.83378600 |
| P      | 1.96026400  | 1.27378600  | -1.46170100 |
| P      | -0.52445800 | 3.19517700  | 0.00828600  |
| P      | -3.15607900 | 1.88806600  | 0.00472700  |
| P      | 1.95947200  | 1.26600800  | 1.46816900  |
| P      | -1.21655800 | 1.30550000  | 2.82750800  |
| P      | 0.08200100  | -1.31986000 | 2.82714700  |
| P      | -3.11065600 | -1.26693300 | 1.46271500  |

## Supporting Information

|    |             |             |             |
|----|-------------|-------------|-------------|
| P  | -3.11059500 | -1.25938700 | -1.46965900 |
| P  | -0.62305800 | -3.19894000 | -0.00835000 |
| P  | 1.99278000  | -1.89660500 | -0.00475600 |
| Zn | 4.54445400  | 0.00264400  | 0.00019400  |
| C  | 6.04384582  | -0.05489435 | -0.00023104 |
| O  | 6.04384582  | -0.05489435 | 1.16892496  |
| O  | 6.04384582  | -0.05489435 | -1.16938704 |

### E3

| Symbol | X           | Y           | Z           |
|--------|-------------|-------------|-------------|
| B      | -0.56248300 | 2.42607800  | -0.15026100 |
| B      | 0.57502800  | 1.31708700  | 2.36527800  |
| B      | 1.80907400  | 2.43342100  | -0.10531100 |
| B      | 0.66922900  | 1.06037300  | -2.49113100 |
| B      | 3.02876500  | 0.06352000  | 1.23237700  |
| B      | 3.07522400  | -0.06030100 | -1.13971900 |
| B      | 1.80716300  | -2.43163300 | 0.15035700  |
| B      | 0.66877100  | -1.31672400 | -2.36538200 |
| B      | 0.57463500  | -1.06078300 | 2.49104100  |
| B      | -0.56440500 | -2.42788700 | 0.10521500  |
| B      | -1.77998500 | -0.06361400 | -1.22660700 |
| B      | -1.83039800 | 0.06042000  | 1.13851600  |
| P      | 3.45380000  | 1.46636000  | -0.02234800 |
| P      | 3.45277700  | -1.46271800 | 0.13078100  |
| P      | 2.03078100  | 0.15031600  | 2.85795900  |
| P      | 0.59356900  | 2.91233600  | 1.31520300  |

## Supporting Information

|    |             |             |             |
|----|-------------|-------------|-------------|
| P  | 0.64979200  | 2.75679700  | -1.61380900 |
| P  | -0.89840900 | 0.14777800  | 2.79828700  |
| P  | -2.21096700 | 1.46007000  | -0.12986000 |
| P  | -2.21215100 | -1.46380700 | 0.02367100  |
| P  | -0.78963200 | -0.15010800 | -2.85302600 |
| P  | 2.14060400  | -0.14801400 | -2.80249500 |
| P  | 0.64761100  | -2.91204900 | -1.31539700 |
| P  | 0.59174000  | -2.75712900 | 1.61363700  |
| Zn | -4.96986000 | 0.00009000  | -0.00203200 |
| C  | -7.83204042 | 1.05706380  | 0.60442242  |
| O  | -7.76155140 | 2.04136661  | 1.23140329  |
| O  | -7.90252945 | 0.07276098  | -0.02255846 |

### E4

| Symbol | X           | Y           | Z           |
|--------|-------------|-------------|-------------|
| B      | -1.92998300 | -1.39339900 | 2.26428300  |
| B      | -3.50972000 | -1.68885000 | -0.24536400 |
| B      | -0.78602900 | -2.59045200 | 0.55936200  |
| B      | 0.74687700  | -0.26770300 | 1.61662200  |
| B      | -1.26380300 | -1.58198000 | -2.20318900 |
| B      | 0.81231700  | -0.88777000 | -1.28892200 |
| B      | -0.86441200 | 1.36939200  | -2.26942900 |
| B      | 0.70817000  | 1.65793100  | 0.24125300  |
| B      | -3.54771800 | 0.24466700  | -1.62682800 |
| B      | -2.00883600 | 2.56460100  | -0.56306800 |
| B      | -1.52941500 | 1.55908700  | 2.20160700  |

## Supporting Information

|    |             |             |             |
|----|-------------|-------------|-------------|
| B  | -3.61131100 | 0.86460800  | 1.28682100  |
| P  | -0.00563100 | -2.63119800 | -1.18323800 |
| P  | -0.05266000 | -0.24481300 | -2.88838200 |
| P  | -3.17259700 | -1.57654200 | -2.14205500 |
| P  | -2.63609300 | -2.74582800 | 1.08332700  |
| P  | -0.06610200 | -1.89095800 | 2.20741200  |
| P  | -4.58832000 | -0.10212500 | -0.03926900 |
| P  | -2.73997000 | 0.22110600  | 2.88381700  |
| P  | -2.78710600 | 2.60626400  | 1.18010500  |
| P  | 0.38159700  | 1.55249100  | 2.13875200  |
| P  | 1.78435700  | 0.07681700  | 0.03355700  |
| P  | -0.15776900 | 2.72058500  | -1.08715800 |
| P  | -2.72735600 | 1.86651000  | -2.21212300 |
| Zn | 4.76384600  | 0.28326700  | 0.04029300  |
| C  | 8.74844600  | -0.25098100 | -0.03153100 |
| O  | 8.53702100  | -1.40070100 | -0.00091800 |
| O  | 8.96648400  | 0.89727100  | -0.06240000 |

.....
